# Supplementary material for: Insights into the multi-functional lithium difluoro(oxalate)borate additive in boosting the Li-ion reaction kinetics for Li3VO4 anodes
Source: Royal Society of Chemistry journal article supplement (doi:10.1039/d3cp04952c), 2023-12-06
Supplement: d3cp04952c1.pdf [file d3cp04952c1.pdf]

# Electronic Supplementary Information

## Insights into the multi-functional lithium difluoro(oxalate)borate additive in boosting Li-ion reaction kinetics for $\text{Li}_3\text{VO}_4$ anodes

Miaomiao Zhang<sup>1</sup>, Cunyuan Pei<sup>1\*</sup>, Qiqi Xiang<sup>1</sup>, Lintao Liu<sup>1</sup>, Zhongxu Dai<sup>1\*</sup>, Huijuan Ma<sup>2</sup>, Shibing Ni<sup>1\*</sup>

<sup>1</sup> College of Materials and Chemical Engineering, Key Laboratory of Inorganic Nonmetallic Crystalline and Energy Conversion Materials, China Three Gorges University, Yichang, 443002, China

<sup>2</sup> Hubei Three Gorges Laboratory, Yichang, 443007, China.

\* E-mail: peicunyuan@ctgu.edu.cn; daizx@ctgu.edu.cn; shibingni07@126.com

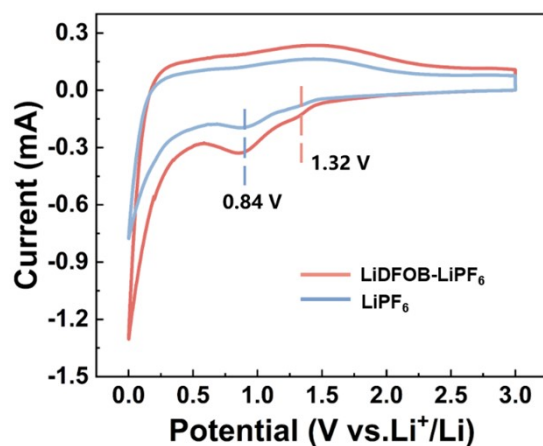

**Figure S1** Cyclic voltammety curve of LVO/NC NFs after the first cycle in LiDFOB-LiPF<sub>6</sub> double salt and LiPF<sub>6</sub> electrolyte.

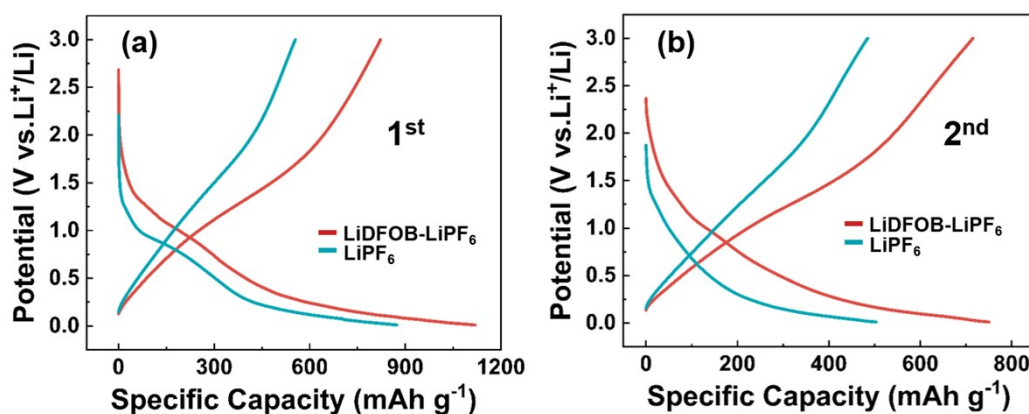

**Figure S2** Charge and discharge curves of LVO/NC NFs in LiDFOB-LiPF<sub>6</sub> double salt electrolyte and single LiPF<sub>6</sub> different electrolytes (a) the first circle (b) the second circle.

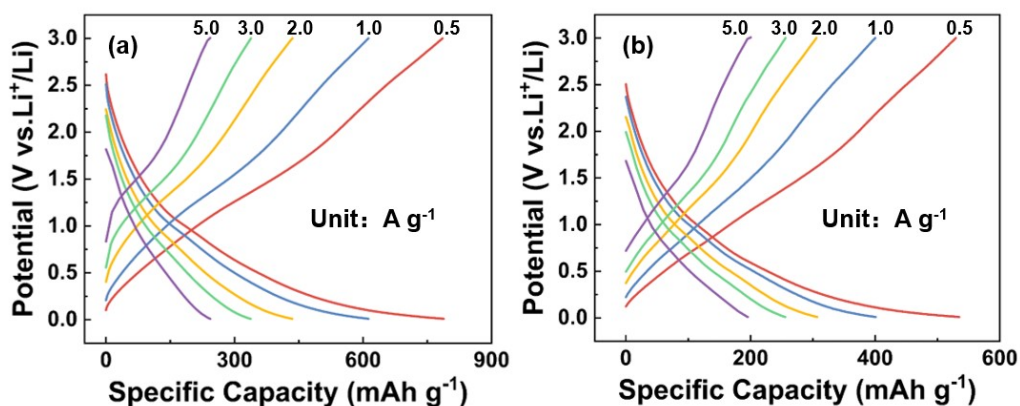

**Figure S3** Charge and discharge curves of LVO/NC NFs in different electrolytes (a) LiDFOB-LiPF<sub>6</sub> and (b) LiPF<sub>6</sub> with different current densities (0.5/1.0/2.0/3.0/5.0 A g<sup>-1</sup>)

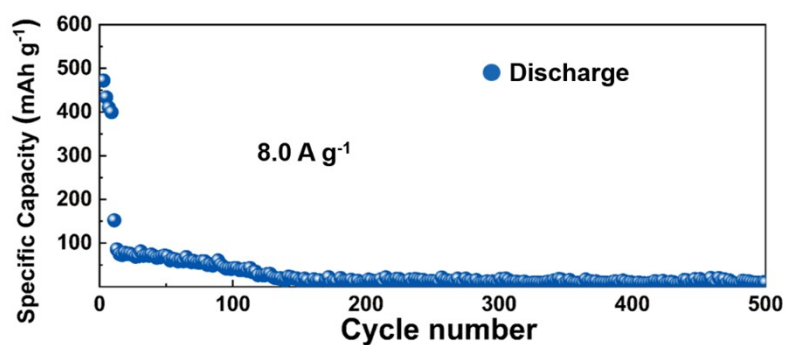

**Figure S4** Cycling performance of LVO/NC NFs in  $\text{LiPF}_6$  electrolyte at A high current density of  $8.0 \text{ A g}^{-1}$ .

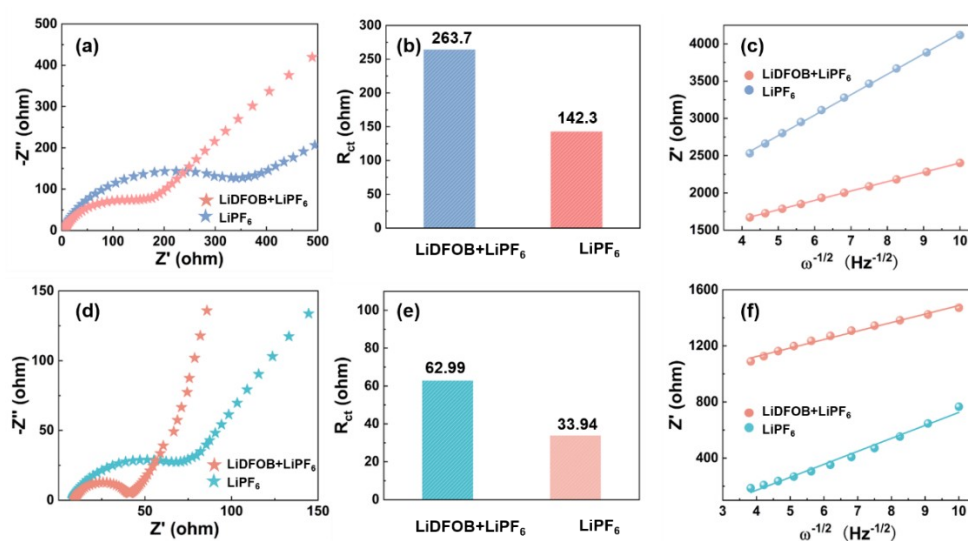

**Figure S5** (a-c) The EIS spectra, fitted  $R_{ct}$  and complex impedance vs.  $\omega^{-1/2}$  of LVO/NC NFs after 50 cycles in both electrolytes. (d-f) The EIS spectra, fitted  $R_{ct}$  and complex impedance vs.  $\omega^{-1/2}$  of LVO/NC NFs after 200 cycles in both electrolytes.

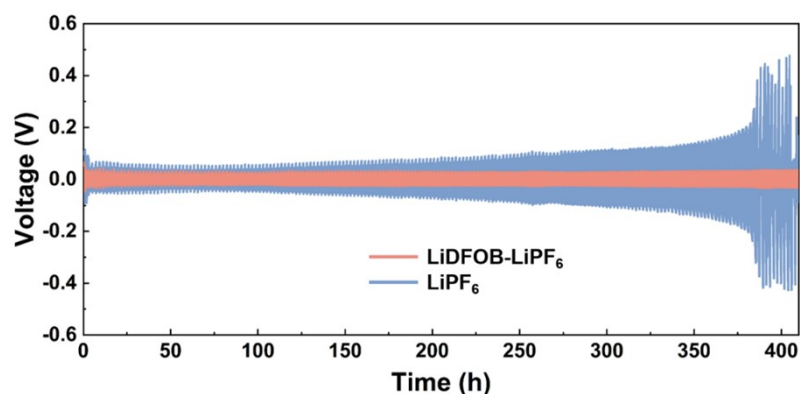

**Figure S6** The cycling performance of Li||Li symmetric cells with LiDFOB- $\text{LiPF}_6$  and  $\text{LiPF}_6$  at the current density of  $0.5 \text{ mA cm}^{-2}$  with a capacity of  $0.5 \text{ mAh cm}^{-2}$  (the cycle time is 400 hours).

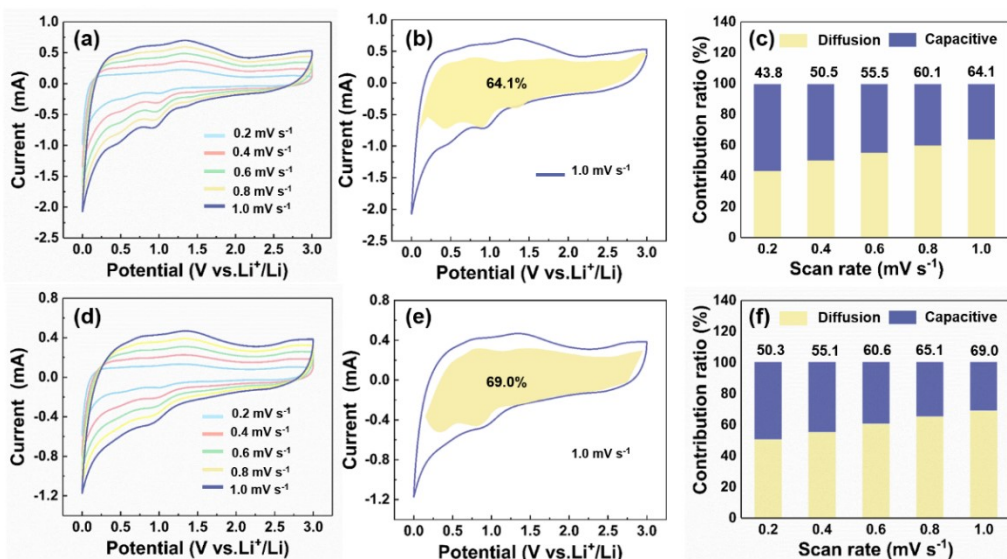

**Figure S7** (a) CV curves of fresh LVO/NC NFs in LiPF<sub>6</sub> blank electrolytes at different scanning rates (b) Fitting diagram of pseudocapacitance contribution at scanning rate of 1.0 mV s<sup>-1</sup> (c) Ratio of pseudocapacitance contribution and diffusion contribution at different scanning speeds (d) LVO/NC CV curve of NFs electrode at different scanning rates after 200 cycles in LiPF<sub>6</sub> blank electrolyte (e) Fitting diagram of pseudocapacitance contribution at a scanning rate of 1.0 mV s<sup>-1</sup> (f) Contribution ratio of pseudocapacitance and diffusion contribution at different scanning speeds.

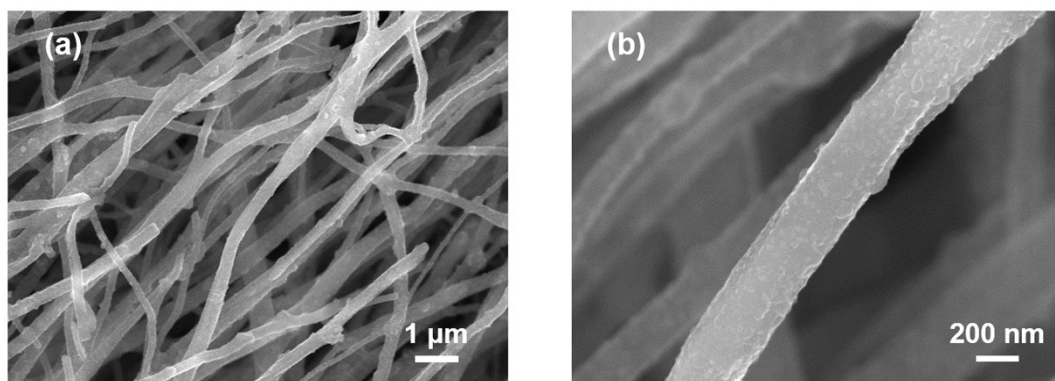

**Figure S8** SEM images of LVO/NC NFs with different magnifications.

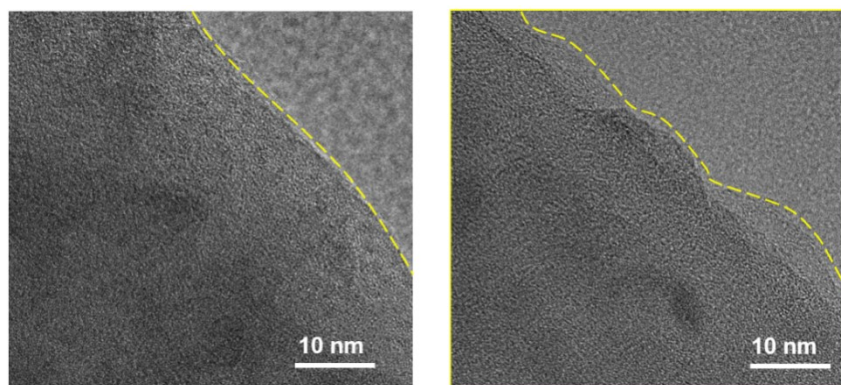

**Figure S9** TEM images of LVO/NC NFs in (a) LiDFOB-LiPF<sub>6</sub> and (b) LiPF<sub>6</sub>
